# Supplementary material for: Variants in the 3' UTR of General Transcription Factor IIF, polypeptide 2 affect female calving efficiency in Japanese Black cattle
Source: PubMed Central journal article supplement (PMC3656791; doi:10.1186/1471-2156-14-41), 2013-05-10

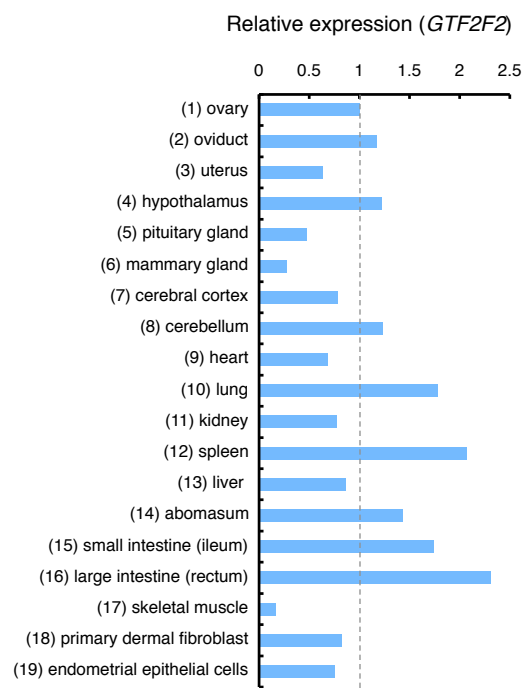

Supplement: 1471-2156-14-41-S6.pdf [file 1471-2156-14-41-S6.pdf]
